# Supplementary material for: Feasting, fasting and freezing: energetic effects of meal size and temperature on torpor expression by little brown batsMyotis lucifugus
Source: Oxford University Press journal article supplement (doi:10.1242/jeb.040188), 2010-05-28
Supplement: jeb040188tables1.pdf [file jeb040188tables1.pdf]

Table S1. Results for two-factor ANCOVAs run on all dependent variables

| Dependent variable                                                                | Independent variable     |                          |                          |                         |
|-----------------------------------------------------------------------------------|--------------------------|--------------------------|--------------------------|-------------------------|
|                                                                                   | Feeding treatment        | Ambient temperature      | Pre-meal body mass       | Individual              |
| Time to torpor entry (min)                                                        | $F_{39,2}=9.2, P=0.001$  | $F_{39,1}=3.6, P=0.07$   | $F_{39,1}=8.6, P=0.005$  | $F_{39,8}=4.2, P=0.001$ |
| Duration of cooling period (min)                                                  | $F_{39,2}=2.7, P=0.08$   | $F_{39,1}=5.5, P=0.02$   | $F_{39,1}=0.0, P=0.91$   | $F_{37,8}=1.6, P=0.15$  |
| Maximum rate of torpor entry (ml O <sub>2</sub> min <sup>-1</sup> )               | $F_{38,2}=1.4, P=0.26$   | $F_{38,1}=10.9, P=0.002$ | $F_{38,1}=3.3, P=0.08$   | $F_{38,8}=1.7, P=0.13$  |
| Mean pre-torpor normothermic $\dot{V}_{O_2}$ (ml O <sub>2</sub> h <sup>-1</sup> ) | $F_{39,2}=3.7, P=0.03$   | $F_{39,1}=31.5, P<0.001$ | $F_{39,1}=0.2, P=0.66$   | $F_{39,8}=1.2, P=0.32$  |
| Mean torpid MR (kJ h <sup>-1</sup> )                                              | $F_{39,2}=0.0, P=0.99$   | $F_{39,1}=45.6, P<0.001$ | $F_{39,1}=0.1, P=0.76$   | $F_{39,8}=1.3, P=0.26$  |
| Mean pre-torpor normothermic MR (kJ h <sup>-1</sup> )                             | $F_{37,2}=0.3, P=0.76$   | $F_{37,1}=14.1, P=0.001$ | $F_{37,1}=1.5, P=0.23$   | $F_{37,8}=0.9, P=0.55$  |
| Total energy expended before torpor (kJ)                                          | $F_{39,2}=13.1, P<0.001$ | $F_{39,1}=15.1, P<0.001$ | $F_{39,1}=9.7, P=0.003$  | $F_{39,8}=5.1, P<0.001$ |
| Total energy expended over entire trial (kJ)                                      | $F_{39,2}=9.0, P=0.001$  | $F_{39,1}=0.2, P=0.64$   | $F_{39,1}=15.2, P<0.001$ | $F_{39,8}=4.2, P=0.001$ |
| Reduction in body mass (g)                                                        | $F_{39,2}=9.6, P<0.001$  | $F_{39,1}=29.3, P<0.001$ | $F_{39,1}=11.7, P=0.001$ | $F_{39,8}=3.7, P=0.002$ |

MR, metabolic rate;  $\dot{V}_{O_2}$ , rate of oxygen consumption.
