# Supplementary material for: Feasting, fasting and freezing: energetic effects of meal size and temperature on torpor expression by little brown batsMyotis lucifugus
Source: Oxford University Press journal article supplement (doi:10.1242/jeb.040188), 2010-05-28
Supplement: jeb040188tables2.pdf [file jeb040188tables2.pdf]

Table S2. Results of one-factor ANCOVAs used to examine the effects of feeding treatment at each of the two temperature treatments (7°C and 17°C) independently

| Dependent variable                                                                | Effect of feeding treatment |                         |
|-----------------------------------------------------------------------------------|-----------------------------|-------------------------|
|                                                                                   | 7°C                         | 17°C                    |
| Time to torpor entry (min)                                                        | $F_{22,2}=3.6, P=0.05$      | $F_{23,2}=4.3, P=0.03$  |
| Length of cooling period (min)                                                    | $F_{23,2}=0.4, P=0.65$      | $F_{23,2}=2.0, P=0.16$  |
| Mean pre-torpor normothermic $\dot{V}_{O_2}$ (ml O <sub>2</sub> h <sup>-1</sup> ) | $F_{23,2}=1.3, P=0.30$      | $F_{23,2}=8.3, P=0.002$ |
| Mean pre-torpor normothermic MR (kJ h <sup>-1</sup> )                             | $F_{23,2}=2.3, P=0.12$      | $F_{23,2}=2.6, P=0.10$  |
| Total energy expended before torpor entry (kJ)                                    | $F_{22,2}=3.0, P=0.07$      | $F_{23,2}=5.1, P=0.02$  |
| Total energy expended over entire trial (kJ)                                      | $F_{22,2}=4.2, P=0.03$      | $F_{23,2}=2.5, P=0.10$  |
| Reduction in body mass (g)                                                        | $F_{23,2}=4.0, P=0.03$      | $F_{23,2}=2.0, P=0.16$  |

MR, metabolic rate;  $\dot{V}_{O_2}$ , rate of oxygen consumption.
