# Supplementary material for: Feasting, fasting and freezing: energetic effects of meal size and temperature on torpor expression by little brown batsMyotis lucifugus
Source: Oxford University Press journal article supplement (doi:10.1242/jeb.040188), 2010-05-28
Supplement: jeb040188tables3.pdf [file jeb040188tables3.pdf]

Table S3. Results of one-factor ANCOVAs used to examine the effects of temperature treatment on each of the three feeding treatments independently

| Dependent variable                                                  | Effect of temperature treatment following |                          |                          |
|---------------------------------------------------------------------|-------------------------------------------|--------------------------|--------------------------|
|                                                                     | Sham feeding                              | Half meal                | Full meal                |
| Time to torpor entry (min)                                          | $F_{16,1}=0.2, P=0.66$                    | $F_{15,1}=6.2, P=0.025$  | $F_{15,1}=0.0, P=0.90$   |
| Length of cooling period (min)                                      | $F_{16,1}=0.1, P=0.73$                    | $F_{15,1}=12.5, P=0.003$ | $F_{15,1}=1.2, P=0.29$   |
| Maximum rate of torpor entry (ml O <sub>2</sub> min <sup>-1</sup> ) | $F_{15,1}=2.3, P=0.15$                    | $F_{15,1}=2.8, P=0.12$   | $F_{15,1}=8.4, P=0.011$  |
| Mean torpid MR (kJ h <sup>-1</sup> )                                | $F_{16,1}=59.5, P<0.001$                  | $F_{15,1}=2.9, P=0.11$   | $F_{15,1}=67.2, P<0.001$ |
| Mean pre-torpor normothermic MR (kJ h <sup>-1</sup> )               | $F_{16,1}=9.4, P=0.007$                   | $F_{15,1}=0.1, P=0.78$   | $F_{15,1}=17.5, P=0.001$ |
| Total energy expended before torpor entry (kJ)                      | $F_{16,1}=2.0, P=0.17$                    | $F_{15,1}=6.5, P=0.02$   | $F_{15,1}=2.8, P=0.12$   |
| Total energy expended over entire trial (kJ)                        | $F_{16,1}=0.0, P=0.96$                    | $F_{15,1}=0.1, P=0.71$   | $F_{15,1}=0.8, P=0.40$   |
| Reduction in body mass (g)                                          | $F_{16,1}=8.4, P=0.01$                    | $F_{15,1}=6.6, P=0.02$   | $F_{15,1}=3.9, P=0.07$   |

MR, metabolic rate.
